# Supplementary material for: Experimental Study on Conductivity Anisotropy of Limestone Considering the Bedding Directional Effect in the Whole Process of Uniaxial Compression
Source: MDPI journal article supplement (doi:10.3390/ma9030165), 2016-03-04
Supplement: s1 [file s1]

# Supplementary Materials: Experimental Study on Conductivity Anisotropy of Limestone Considering the Bedding Directional Effect in the Whole Process of Uniaxial Compression

Xinji Xu, Bin Liu, Shucai Li, Lei Yang, Jie Song, Ming Li and Jie Mei

To control the article length, we just use six representative rock samples in this paper. The other four figures are shown as following.

Two rock samples parallel to the bedding direction:

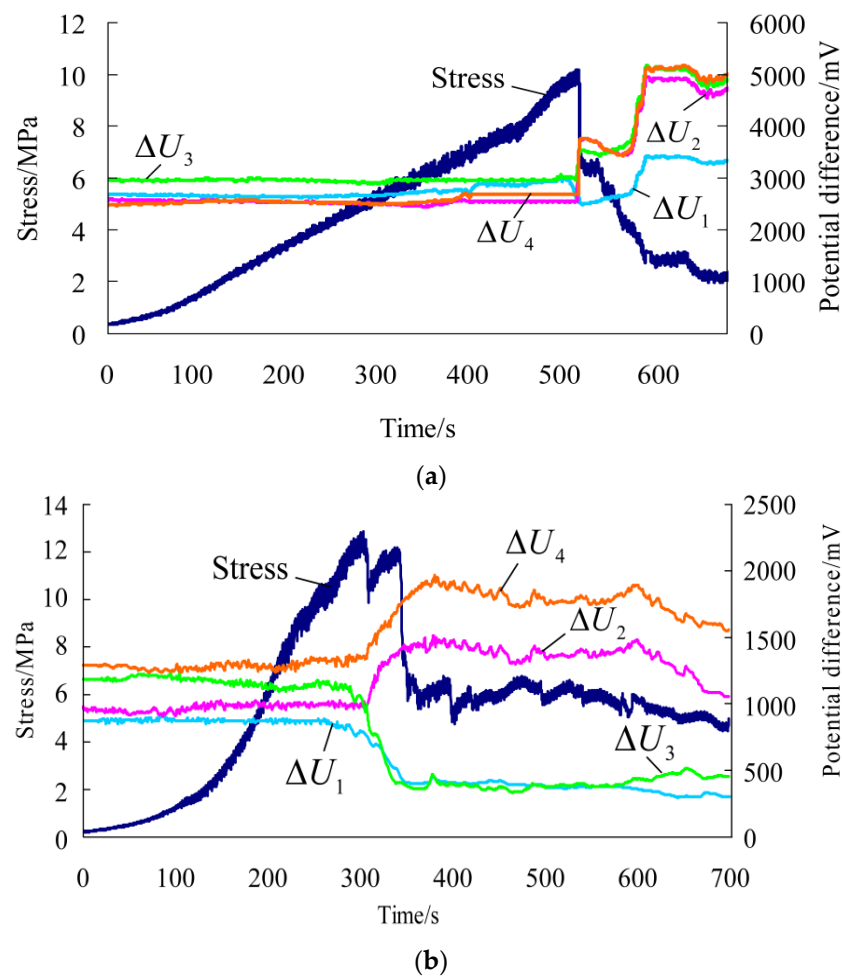

**Figure S1.** Stress-time curve and time-varying curve of the potential difference in each direction during the whole process of uniaxial compression for rock samples parallel to the bedding direction. (a) Rock sample 6-5; (b) Rock sample 7-2.

The other two rock samples normal to the bedding direction:

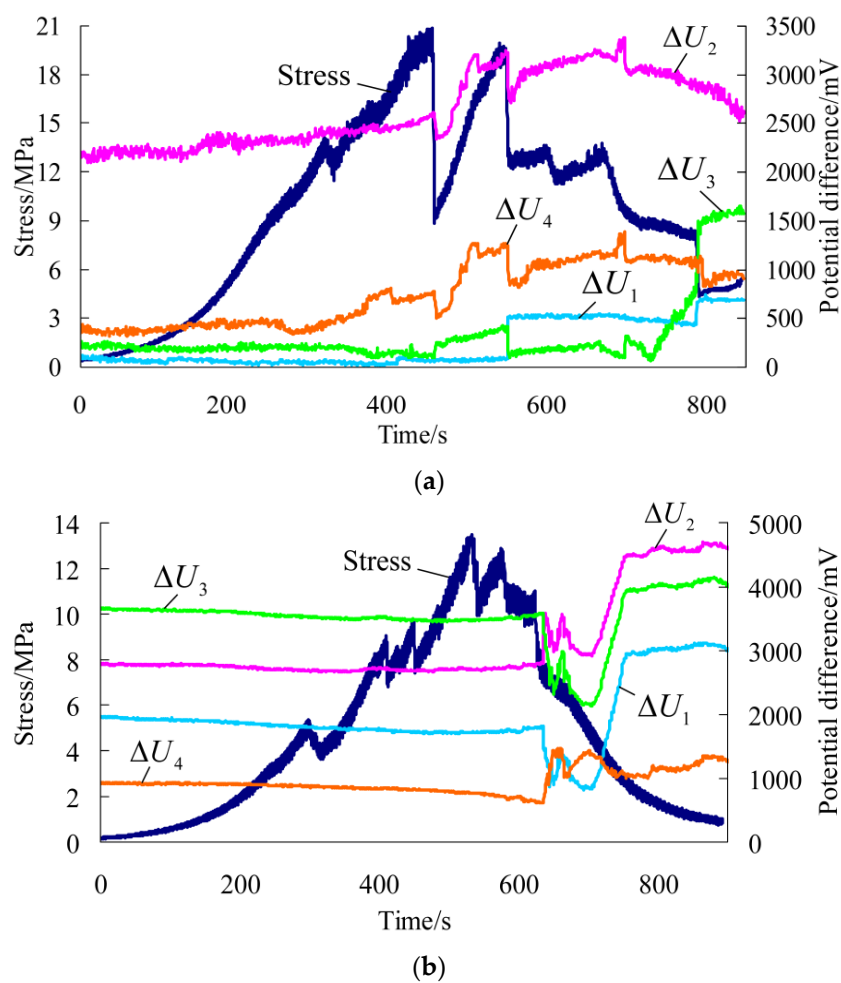

**Figure S2.** Stress-time curve and time-varying curve of the potential difference in each direction during the whole process of uniaxial compression for rock samples normal to the bedding direction. (a) Rock sample 6-2; (b) Rock sample 6-3.
